# Supplementary material
Source: PubMed Central journal article supplement (PMC5010952)
Supplement: NIHMS803985-supplement-1.pdf [file NIHMS803985-supplement-1.pdf]

## Supplemental Fig. 1 related to Figure 1

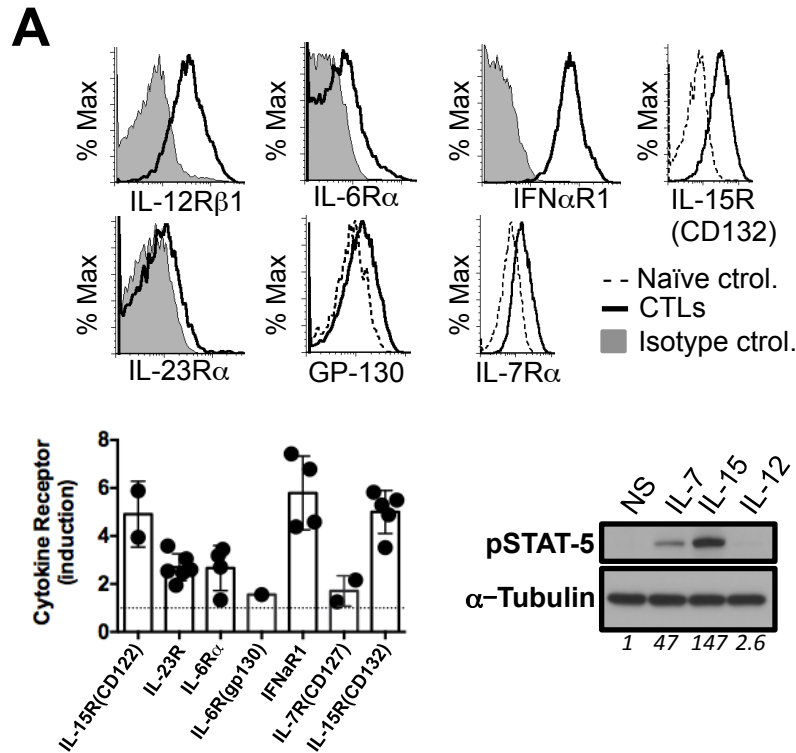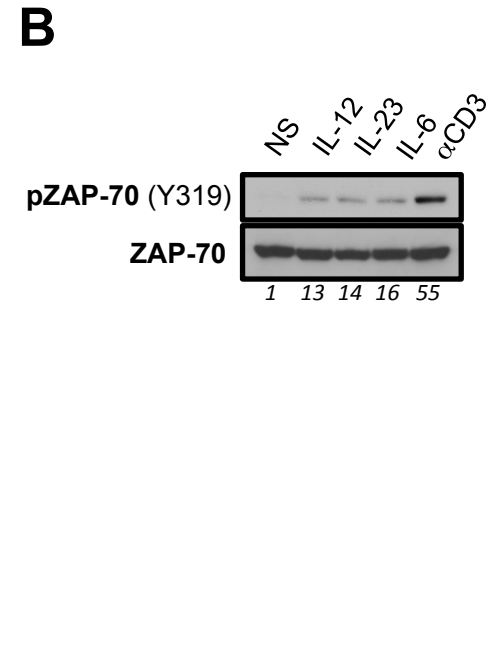

**Supplemental Fig. 1. Pro-inflammatory cytokines induce the phosphorylation of ZAP-70 in Effector CD8 T cells.** Day 3 polyclonal CTLs generated upon stimulation of anti-CD3/28 were assayed for surface expression of the indicated cytokine receptor subunits by flow cytometry (top histograms and bar graph) or stimulated with 10 ng/mL of the indicated cytokines for 15 minutes followed by immunoblot with antibodies specific for pSTAT-5 (Y694) or B) pZAP-70 (Y319). Tubulin and ZAP-70 loading controls were determined in the same gel (A) or after stripping (B). Bar graph indicates induction of the subunit of the cytokine receptor indicated relative to control.

## Supplemental Fig. 2 related to Figure 3

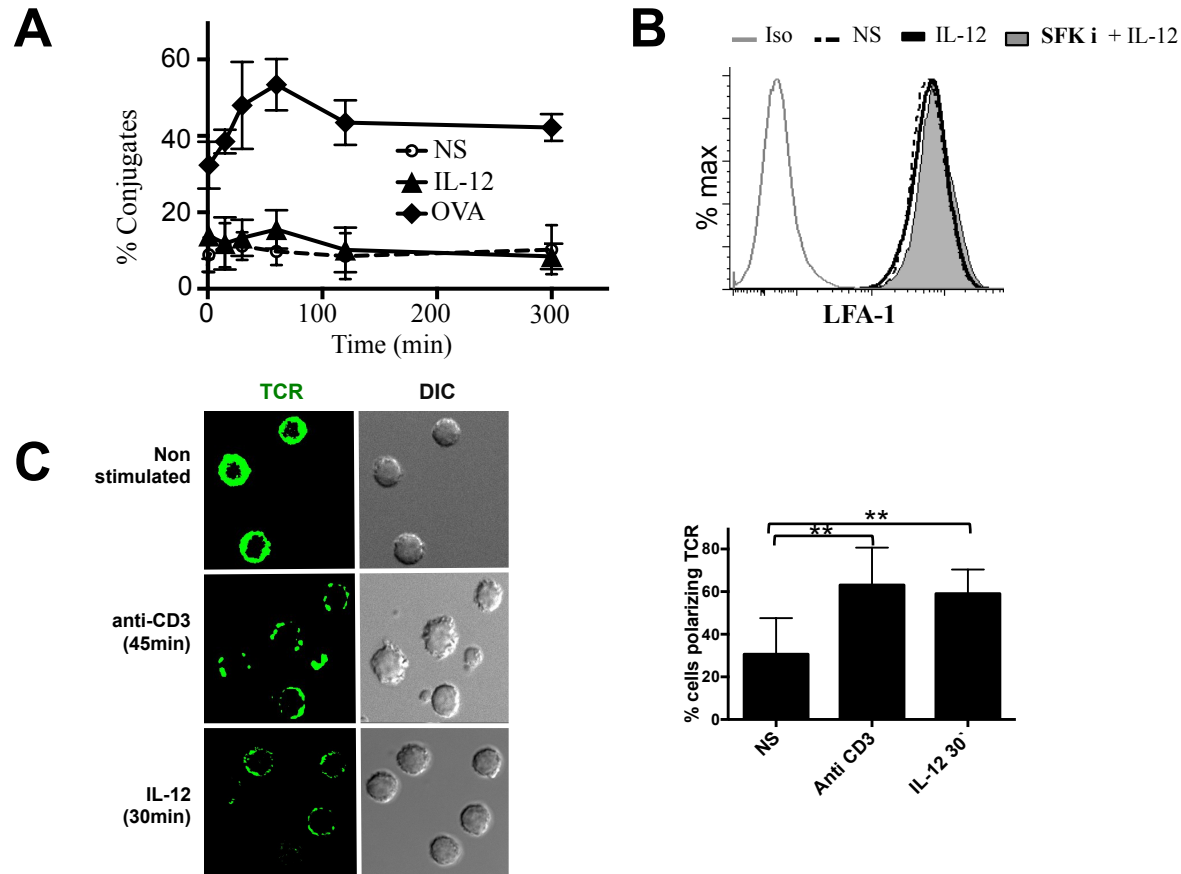

**Supplemental Fig. 2. Bystander activation does not influence conjugate formation or LFA-1 expression. However, IL-12 stimulation enhances TCR/CD3 clustering** (A) Day 3 CTLs were mixed 1:1 with congenically marked APCs pulsed with OVA<sub>p</sub> as a positive control or not pulsed in the presence of IL-12 or in the absence of IL-12 (NS). % Conjugates were determined by flow cytometry as described in (Teixeiro et al., 2009). (B) CTLs were cultured as in figure 3D before assessing LFA-1 expression by flow cytometry. Graphs show mean±SD with data from 3 independent experiments. (C) Day 3 CTLs were stimulated for 15-30 minutes with 20 ng/mL IL-12 or 10 $\mu$ g/mL anti-CD3 (followed by crosslinking with goat anti-Hamster-Alexa 488). Clustering of CD3 was assessed by confocal microscopy relative to positive and negative controls as described in (Teixeiro et al. Immunity 2004). \*\*p<0.01.

## Supplemental Fig. 3 related to Figure 6

**A**

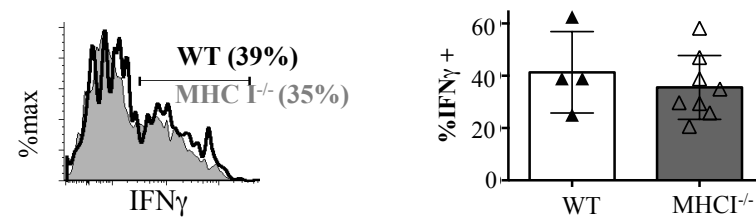

**Supplemental Fig. 3. In vivo bystander activation of OT-I memory is independent of MHC I** (A)  $5 \times 10^4$  congenically marked OT-1 memory T-cells (CD8-enriched, CD45.2<sup>+</sup>, CD44<sup>hi</sup>) from  $\geq 120$  days VSV-OVA infected chimeric mice generated as in Figure 6 were adoptively transferred into MHC I + sufficient (WT) or deficient (MHC I<sup>-/-</sup>) hosts and subsequently re-challenged with ( $1 \times 10^5$  CFU) *Listeria monocytogenes*. 16 hours later cells were harvested from lymph nodes and spleens and *de novo* intracellular IFN $\gamma$  synthesis was measured over 3h. by flow cytometry. All graphs show mean  $\pm$ SD for frequency of IFN $\gamma$  positive bystander activated memory OT-I cells. Data is representative of at least 3 independent experiments with n= 3-4 mice per group.
